# Supplementary material
Source: publisher site journal article supplement (https://www.dovepress.com/article/368162)
Supplement: Supplementary file 1 [file get_supplementary_file.php]

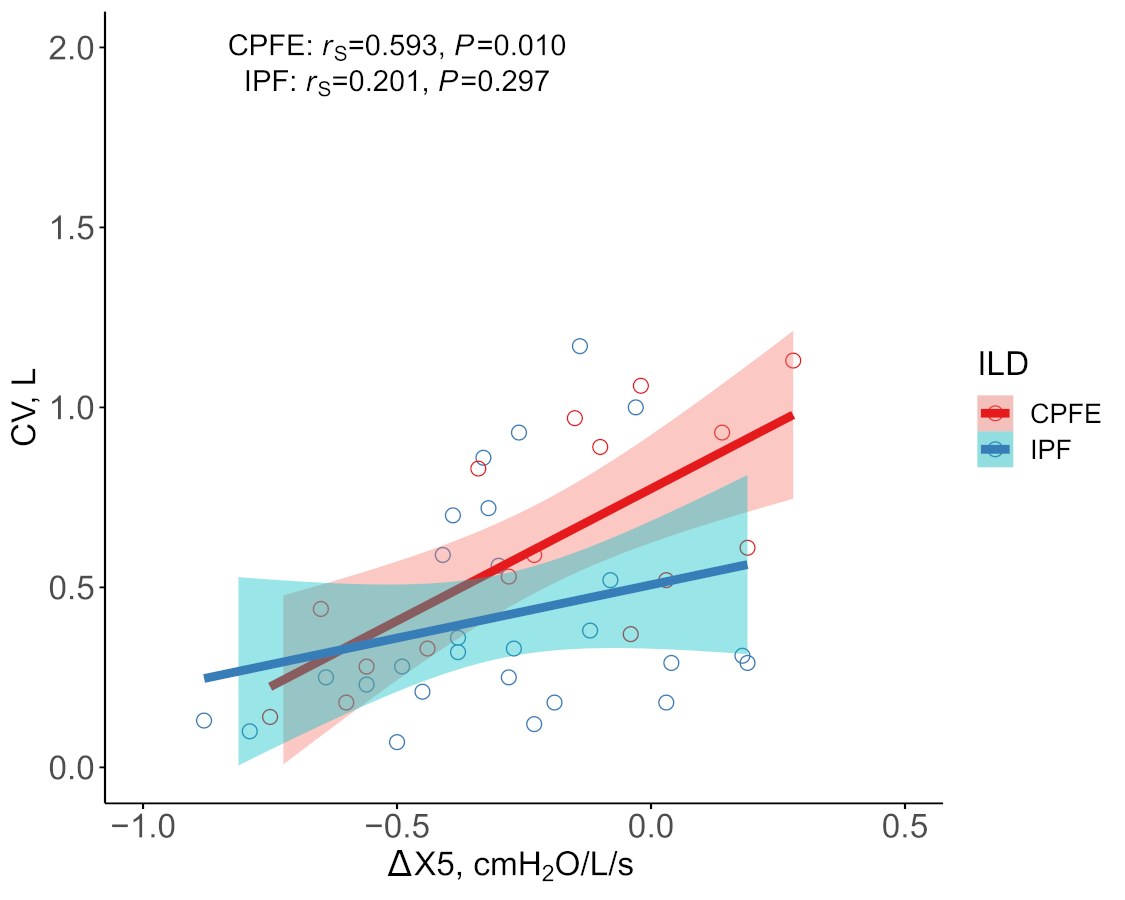


**Supplementary Figure 1** Correlations between CV and ΔX5 in patients with CPFE(n=18) and IPF (n=29). ΔX5 was associated with CV only in patients with CPFE.

**Abbreviations:** CPFE, combined pulmonary fibrosis and emphysema; CV, closing volume; ΔX5, the difference between inspiratory and expiratory mean values in respiratory reactance at 5 Hz; IPF, idiopathic pulmonary fibrosis; *r*S, Spearman’s rank correlation coefficient
